1 **Title:**

2 *Pseudomonas aeruginosa* synthesizes the autoinducers of its oxylipin-dependent  
3 quorum sensing system extracellularly.

4

5

6

7 **Running Title:** Extracellular biosynthesis of the ODS autoinducers

8

9 **Authors:**

10 Eriel Martínez<sup>1\*</sup>, Carlos J. Orihuela<sup>1</sup> and Javier Campos-Gomez<sup>2</sup>

11

12 **Affiliations**

- 13 1. Department of Microbiology, The University of Alabama at Birmingham,  
14 Birmingham, Alabama, USA.  
15 2. Cystic Fibrosis Research Center, The University of Alabama at Birmingham,  
16 Birmingham, Alabama, USA.

17

18

19

20 **Key Words**

21 *Pseudomonas aeruginosa*, Quorum sensing, Oxylipins, Oleic acid, Autoinducer, Type 2  
22 secretion system.

23

24 **\*Address correspondence to:** emartz@uab.edu

25

26

27 **ABSTRACT**

28 The oxylipin-dependent quorum sensing system (ODS) of *Pseudomonas aeruginosa*  
29 relies on the production and sensing of two oxylipin autoinducers, 10S-hydroxy-(8E)-  
30 octadecenoic acid (10-HOME) and 7S,10S dihydroxy-(8E)-octadecenoic acid (7,10-  
31 DiHOME). Here, and contrary to the prevailing notion that bacterial autoinducers are  
32 synthesized intracellularly, we show that 10-HOME and 7,10-DiHOME biosynthesis  
33 occurs extracellularly, and this requires the secretion of the oxylipin synthases. We  
34 implemented a genetic screen of *P. aeruginosa* strain PAO1, which identified fourteen  
35 genes required for the synthesis of oxylipins. Among the identified genes, four encoded  
36 components of the ODS system and the other ten were part of the Xcp type II secretion  
37 system (T2SS). We created a deletion mutant of *xcpQ*, which encodes the outer  
38 membrane component of Xcp, and found it recapitulated the impaired functionality of the  
39 transposon mutants. Upon further examination, the lack of ODS function was  
40 demonstrated to be caused by the blocking of the DS enzymes secretion. Notably, the  
41 *xcpQ* mutant activated the ODS system when exposed to 10-HOME and 7,10-DiHOME,  
42 indicating that the sensing component of this quorum sensing system remains fully  
43 functional. In contrast with the detrimental effect previously described for T2SS in biofilm  
44 formation, here we observed that T2SS was required for robust *in vitro* and *in vivo* biofilm  
45 formation in an ODS dependent manner. To the best of our knowledge, this study is the  
46 first to find QS autoinducers that are synthesized in the extracellular space and provides  
47 new evidence for the role of the T2SS for biofilm formation in *P. aeruginosa*.

48

49

50 **IMPORTANCE**

51 We previously showed that the ODS quorum sensing system of *P. aeruginosa* produces  
52 and responds to oxylipins derived from host oleic acid by enhancing biofilm formation  
53 and virulence. Herein, we developed a genetic screen strategy to explore the molecular  
54 basis for oxylipins synthesis and detection. Unexpectedly, we found that the ODS  
55 autoinducer synthases cross the outer membrane using the Xcp Type 2 secretion  
56 system of *P. aeruginosa* and thus, the biosynthesis of oxylipins occur extracellularly.  
57 Biofilm formation, which was thought to be impaired as result of Xcp activity, was found  
58 to be enhanced as result of ODS activation. This is a unique QS system strategy and  
59 reveals a new way by which *P. aeruginosa* interacts with the host environment.

60

61

## 62 INTRODUCTION

63 *Pseudomonas aeruginosa* is an opportunistic pathogen that can cause disease in  
64 plants, animals and humans with breaches in their mechanical or physiological defense  
65 barriers (1). One reason for this is that *P. aeruginosa* has a versatile battery of  
66 extracellular and surface-associated virulence factors and is therefore able to form  
67 recalcitrant biofilms that protect it from diverse conditions of stress, including the immune  
68 system and antibiotics (2). Quorum sensing (QS) is a bacterial cell-to-cell communication  
69 system that functions to regulates behavior at the cell community-level. QS systems have  
70 been shown to play a critical role in the regulation of virulence factors and biofilm  
71 formation in *P. aeruginosa* (3). Indeed, deletion of any of the previously described  
72 interconnected QS systems of *P. aeruginosa*, *las*, *rhl*, PQS and IQS, has been  
73 demonstrated to attenuate bacterial virulence in a variety of animal models (4). Recently  
74 we described a fifth QS system for *P. aeruginosa* that is regulated by oxylipins, hence  
75 named Oxylipin-Dependent Quorum Sensing System (ODS) (5). Similar to *P.*  
76 *aeruginosa*'s other QS systems, we showed that disruption of ODS strongly attenuated  
77 bacterial virulence in both plant and animal models (6). Accordingly, we showed that the  
78 ODS system regulates *P. aeruginosa* twitching, swarming, flagella-mediated swimming,  
79 which promotes biofilm formation.

80 Oxylipins are bioactive oxygenated lipids. In mammals, oxylipins are derived from  
81 polyunsaturated fatty acids by the action of cyclooxygenase, lipoxygenase, or cytochrome  
82 P450 oxygenase enzymes (7). They serve to modulate inflammatory pathways, but also  
83 have multiple other functions including antimicrobial properties. Oxylipins are also  
84 produced by invertebrates, plants, and fungi (8). Typically, oxylipins are not stored in

85 tissues but are formed on demand from precursor fatty acids of endogenous sources (9).  
86 Pertinently, *P. aeruginosa* ODS relies on the presence and sensing of the extracellular  
87 oxylipins (10*S*)-hydroxy-(8*E*)-octadecenoic acid (10-HOME) and 7*S*,10*S*-dihydroxy-(8*E*)-  
88 octadecenoic acid (7,10-DiHOME)(10). We have shown these are synthesized by *P.*  
89 *aeruginosa* from exogenous oleic acid (OA) using the fatty acid diol synthase (DS)  
90 enzymes that are encoded by the DS operon (Fig 1A) (11).

91         Canonically, the biosynthesis of bacterial QS autoinducers occurs intracellularly  
92 using endogenous sources (12), and these are released to the extracellular space by a  
93 variety of means (13). The mechanisms by which the autoinducers reach the extracellular  
94 space depends on the nature of the autoinducers and the bacterial species; they include  
95 free diffusion through the bacterial membranes, the use of efflux pumps, and via outer  
96 membrane vesicles (14-16). Importantly, and prior to this report, we worked under the  
97 assumption that this held true for the ODS system, and that imported OA from the  
98 bacterial environment was converted within the periplasm of the bacteria to 10-HOME  
99 and 7,10-DiHOME by the DS enzymes (17). Herein we demonstrate that this is not the  
100 case, and that instead the DS enzymes are secreted from the periplasmic space via the  
101 Xcp type II secretion system (T2SS). Once outside the cell they use host-derived  
102 exogenous OA to synthesize the oxylipin autoinducers. To the best of our knowledge this  
103 is the first report of a QS system whose autoinducer molecules are synthesized in the  
104 extracellular space. They highlight the versatility of *P. aeruginosa* to sense and take  
105 advantage of the host environment.

106

107

108 **RESULTS**

109 **Screening for *P. aeruginosa* factors involved in the production of the ODS**

110 **autoinducers.** The DS activity of *P. aeruginosa* introduces one or two hydroxyl groups  
111 into the alkyl chain of OA (Fig. 1A) (10, 18); the oxylipins derived from this activity being  
112 more hydrophilic than the OA substrate. In addition, these oxylipins have surfactant  
113 emulsifying properties that help to dissolve OA in suspension above the critical micelle  
114 concentration. We noticed that these properties of oxylipins enable wildtype *P.*  
115 *aeruginosa* colonies to produce a transparent halo when this bacterium is grown on  
116 Lysogeny Broth (LB) agar plates containing 1% OA, which renders the medium opaque.  
117 Consequently, *P. aeruginosa* lacking DS activity, i.e. the  $\Delta$ DS mutant, do not form this  
118 halo when grown under the same conditions (Fig. 1B).

119 We took advantage of this characteristic phenotype to identify the bacterial genes  
120 involved in oxylipin production. To do this we performed a genetic screen using a  
121 sequence-defined transposon (*ISphoA/hah* or *ISlacZ/hah*) insertion library created in the  
122 model strain PAO1 (19). In total we screened more than 30,000 independent clones for  
123 the inability to form the halo on LB-agar supplemented with 1% of OA (Figure 1C). We  
124 identified 31 colonies unable to form the transparent halo even after re-streaking on fresh  
125 plates. We successfully PCR amplified and sequenced the DNA regions flanking the  
126 transposon for all the 31 mutants, thereby identifying 15 genes putatively required for  
127 oxylipin production (Table 1).

128 Analysis of the identified clones revealed that three of them carried a transposon  
129 insertion in the DS operon, which encodes the DS enzymes OdsA and OdsB that catalyze  
130 oxylipin biosynthesis (annotated as PA2077 and PA2078, respectively, in the

131 pseudomonas database). Two other transpositions occurred in *odsR* (PA2076), the DS  
132 operon transcriptional regulator found immediately upstream and in opposite orientation  
133 to the DS operon. Additionally, two transpositions were identified in the outer membrane  
134 transporter encoded by PA1288, *exFadLO*, which we previously had proposed to be  
135 involved in oxylipin export across the outer membrane (17). Based on our previous  
136 knowledge on the components required for oxylipin biosynthesis, the above-mentioned  
137 transposition events were expected to be found, and thereby confirmed the validity of the  
138 screening strategy. Transposon insertions providing new insight into the ODS system  
139 included nineteen transpositions in genes encoding 9 distinct components of the Xcp  
140 T2SS; all of which are found in the Xcp region of PAO1 chromosome (PA3095 to  
141 PA3105). Another five transpositions occurred in *pilD*, the gene encoding a prepilin  
142 peptidase, which is vital for the processing of some T2SS components in *P. aeruginosa*  
143 (20). Lastly, one transposition occurred in *mutL*, which encodes a DNA mismatch repair  
144 enzyme which promotes large chromosomal deletions in *P. aeruginosa* (21). Subsequent  
145 studies using a clean deletion *mutL* mutant failed to corroborate the halo deficient  
146 phenotype, suggesting that the colony phenotype of the *mutL* transposition found, was  
147 most likely due to a secondary mutation caused by the consequent MutL deficient hyper-  
148 mutagenic phenotype.

149

150 **Oxylipin synthases cross the outer membrane via Xcp T2SS.** T2SS are involved in  
151 the transport of proteins across the outer membrane from the periplasmic space (22). In  
152 *P. aeruginosa* Xcp has been demonstrated to be involved in the translocation of multiple  
153 proteins including established virulence factors (23). To confirm the role of the T2SS in

154 oxylin production we made an in-frame deletion of the gene *xcpQ* ( $\Delta xcpQ$ ), which  
155 encodes the outer membrane porin component of the T2SS. As expected, colonies of  
156  $\Delta xcpQ$  failed to produce transparent halos when plated on LB containing 1% of OA (Fig  
157 2A). In addition, using thin layer chromatography, we confirmed that  $\Delta xcpQ$  failed to  
158 produce any 10-HOME or 7,10-DiHOME in the extracellular space when grown in LB  
159 supplemented with OA (Fig. 2B). Importantly,  $\Delta xcpQ$  deficient mutant complemented *in*  
160 *trans* with a wild type *xcpQ* gene restored the halo and production of oxylin (Fig 2A,  
161 B). These results indicate that the DS enzymes most likely cross the outer membrane  
162 using the T2SS. In agreement with this notion, we found that when PAO1 and  $\Delta xcpQ$   
163 were treated with exogenous 7,10-DiHOME to induce DS gene expression, the DS  
164 enzymes accumulated into the periplasm of the mutant, but not in that of the wildtype  
165 (Fig. 2C). Moreover, contrary to the wildtype controls, cell free supernatants of  $\Delta xcpQ$   
166 did not show DS activity (Fig. 2D).

167

168 **ODS functionality requires DS enzymes secretion through the T2SS.** The ODS  
169 system involves accumulation of oxylin in the extracellular medium and subsequently  
170 sensing of the oxylin signal (5). Accumulated oxylin induce the expression of  
171 several genes in *P. aeruginosa*, previously identified by our group (5). To determine the  
172 impact of the T2SS in the expression of genes under the control of ODS, we followed  
173 the expression kinetic of a representative ODS regulated gene, PA3427 (5). For this, we  
174 made a genetic fusion of PA3427 with the *lacZ* reporter gene. As expected, in a  $\Delta xcpQ$   
175 background PA3427-*lacZ* was unresponsive to the presence of OA (Fig. 4A). To discard  
176 any collateral effect that a dysfunctional T2SS might have on the expression of PA3427



177 we corroborated that this gene was expressed normally in  $\Delta xcpQ$  at the same level of  
178 PAO1 when induced with the purified oxylipin 7,10-DiHOME (Fig. 4B). Thus, Xcp is  
179 required for DS secretion leading to extracellular oxylipin production, however, it is not  
180 involved in the sensing or response to the oxylipin signal.

181  
182 **The T2SS is linked to biofilm formation in *P. aeruginosa*.** The Xcp system of *P.*  
183 *aeruginosa* promote biofilm dispersal. Consequently, the level of Xcp secretome and  
184 biofilm formation under static conditions have an inverse correlation (24). In agreement  
185 with this prior report, we observed an increase in the amount of biofilm formed by  $\Delta xcpQ$   
186 compared to the WT PAO1 strain using the microtiter plate model, when both were grown  
187 in the absence of OA (Fig. 5A). However, in the presence of OA the amount of biofilm  
188 formed by PAO1 was significantly higher than that of  $\Delta xcpQ$  (Fig. 5A). This result agreed  
189 with our previous study reporting that ODS system promotes biofilm formation *in vitro* (6).  
190 We also recapitulated this result *in vivo* using *Drosophila melanogaster* fed with oleic acid-  
191 supplemented food. Imaging of fly crops conclusively showed reduced biofilm formation  
192 for  $\Delta xcpQ$  versus the PAO1 control (Fig. 5B). Thus, the T2SS of *P. aeruginosa* promote  
193 biofilm formation provided that OA is available and a functional ODS system is present.

## 194 195 **DISCUSSION**

196 Herein we report the first example of extracellularly produced QS autoinducers. The  
197 autoinducer synthases OdsA and OdsB of the *P. aeruginosa* ODS system are exported  
198 to the extracellular space through the Xcp T2SS. Once in the extracellular space, the DS  
199 enzymes use exogenous OA as a substrate to synthesize the oxylipin inducers 10-HOME  
200 and 7,10-diHOME, which in turn enter into the bacterial cells, presumably via the ExfadLO

201 transporter (See proposed model in Fig. 6). In addition, this study establishes a new link  
202 between the T2SS, QS and biofilm formation in the relevant opportunistic pathogen *P.*  
203 *aeruginosa*.

204 In *P. aeruginosa*, Xcp is involved in the secretion of several virulence factors, such  
205 as the elastase LasB, the lipase LipA and the alkaline phosphatase PhoA (25). *P.*  
206 *aeruginosa* has a second T2SS known as Hxc (26), but this is thought to have a  
207 considerably restricted role and we observed no evidence of it being involved with the  
208 ODS system. Our finding that the Xcp also exports OdsA and OdsB, increases the  
209 repertoire of virulence factors known to be secreted by this general secretory pathway.  
210 All described T2SS in Gram-negative bacteria employ a two-step process to secrete  
211 proteins from the cytoplasm to the extracellular space through a transient periplasmic  
212 intermediate. The first step of translocation through the inner membrane is commonly  
213 carried out by the Sec or Tat systems (27, 28). Analysis of the amino acid sequence  
214 identified a putative N-terminal signal peptide in both OdsA and OdsB suggesting both  
215 use the Sec secretory pathway for translocation through the inner membrane, although  
216 this remains to be demonstrated (29). Noticeable, the fact that we did not detect  
217 transposition events in the genes encoding components of the Sec secretory pathway is  
218 likely due to the essential role for viability of this system in most bacteria (30, 31).

219 In our genetic screen we identified two independent transposition events in  
220 *exfadLO*, which confirms that the encoded transporter is essential for the normal  
221 functioning of the ODS system. Prior to this report, we had postulated that ExFadLO was  
222 responsible for the export of intracellularly synthesized oxylipins. In light of our finding  
223 that oxylipins are synthesized extracellularly as result of Xcp-dependent secretion of DS

224 enzymes, we now instead propose that one of its main functions is to import oxylipins.  
225 Ongoing studies in the laboratory are testing this hypothesis.

226 Biofilm formation is an important mechanism by which bacteria establish  
227 themselves within a host as well as a mechanism of defense from host factors. OA is an  
228 abundant fatty acid in host tissues, and we previously demonstrated that *P. aeruginosa*  
229 scavenges OA from the host to produce oxylipins, which promotes biofilm formation *in*  
230 *vivo* (6). Here we show that the Xcp T2SS promotes biofilm formation, both *in vitro* and *in*  
231 *vivo*, in the presence of OA in an ODS-dependent fashion. The convergence of these  
232 traits makes sense as OA is a host derived signal, specially from wounded ones, and  
233 formation of biofilm as a result of ODS activation would be a mean to adapt to the host  
234 environment.

235 In summary, we developed a simple screening strategy that allowed the  
236 identification of bacterial genes required for ODS functioning in *P. aeruginosa*. As a result,  
237 we found that the Xcp T2SS of *P. aeruginosa* translocate the DS enzymes, which  
238 synthesize the ODS autoinducers, through the outer membrane. This was an unexpected  
239 finding since the biosynthesis of previously known QS autoinducers occur intracellularly  
240 and subsequently released into the extracellular space. ODS is an environment specific  
241 QS system, which depends on the presence of exogenous OA. Thus, we propose that  
242 the translocation of the DS enzymes to the extracellular media, which is peculiar among  
243 autoinducer synthases, is a way for this QS to be fine-tuned to the host environment,  
244 allowing *P. aeruginosa* to respond quickly to this condition.

245

246

## 247 **MATERIALS AND METHODS**

248 **Bacterial strains, plasmids and culture conditions.** Strains, plasmids and  
249 oligonucleotides used in this study are described in Table 2. Used strains were routinely  
250 grown in lysogeny broth (LB) medium at 37°C, to which agar was added when solid  
251 medium was required. When required, *P. aeruginosa* was grown in M63 media  
252 supplemented with 0.2% glucose, 0.1% casaminoacids and MgSO<sub>4</sub> 1 mM (M63  
253 complete). Antibiotics were added, when necessary, at the following concentrations:  
254 Ampicillin (Amp), 100 µg/mL; Carbenicillin (Cb), 300 µg/mL (*P. aeruginosa*);  
255 Chloramphenicol (Cm), 25 µg/mL for *Escherichia coli* and 200 µg/mL for *P.aeruginosa*;  
256 Kanamycin (Km), 25 µg/mL. OA 90% (Sigma) was added to cultures for oxylipin  
257 production and purification. M63 complete or LB media were supplemented with OA 99%  
258 (Sigma) or purified oxylipins at the specified concentrations when required. LB agar  
259 without NaCl plus 15% sucrose was used to segregate suicide plasmids from  
260 merodiploids during construction of *xcpQ* deletion mutant ( $\Delta xcpQ$ ) strain by allelic  
261 exchange (see below).

262 **Transposon library screening and mutant characterization.** A random mariner  
263 transposon library of *P. aeruginosa* was acquired from the University of Washington (ref).  
264 The transposon library was amplified by growing the bacteria in LB broth up to OD<sub>600</sub> = 1  
265 (exponential phase) and proper dilutions of the bacterial suspension were plated on LB  
266 agar supplemented with 1 % OA to obtain separate clones. More than 30,000  
267 independent colonies were obtained and from those, the clones lacking a transparent  
268 halo were selected for further analysis. The gene mutation of each selected clone was  
269 identified by DNA sequencing as previously described (19).

270 **Genetic constructions.** A region of *P. aeruginosa* PAO1 genome comprising the *xcpQ*  
271 gene and its flanking regions (~550 bp of each flank) was amplified using primers *xcpQ*-  
272 F-*SacI* and *xcpQ*-R-*HindIII* (Table 1). The primers introduced *SacI* and *HindIII* restriction  
273 sites at the extremes of the amplified fragment, which were used to insert the fragment  
274 into the pEX100Tlink suicide vector<sup>2</sup> digested with the same enzymes to obtain pEX-*xcpQ*  
275 plasmid. Subsequently, an internal fragment of 1,867 bp was deleted from the *xcpQ* gene  
276 by doing a reverse PCR amplification using pEX-*xcpQ* as template and primers  $\Delta$ *xcpQ*-  
277 F-*BamHI* and  $\Delta$ *xcpQ*-R- *BamHI*. The amplified fragment was digested with *BamHI* and  
278 self-ligated. The obtained plasmid, which was named pEX- $\Delta$ *xcpQ*, contains *xcpQ* gene  
279 with an internal in-frame deletion flanked by approximately 550 bp by each side (required  
280 for homologous recombination). This suicide plasmid was used to delete *xcpQ* from PAO1  
281 chromosome by allelic replacement. Genetic fusion of PA3427 with the reporter gene *lacZ*  
282 was done as previously described (5).

283

284 **Periplasm extraction.** The periplasm was extracted following the method of Wood (32)  
285 with modifications by Robles-Price *et al.* (33). Briefly, cells were collected by  
286 centrifugation (4,000 × g, 10 min, 4°C), washed twice in 30 mM Tris-HCl, 150 mM NaCl  
287 (pH 7.1), and kept in ice for no longer than 1 h. Periplasm was further obtained by  
288 suspending the cells in 6 mL of 30 mM Tris-HCl, 20% sucrose, 4 mM EDTA, 0.5 mg/mL  
289 lysozyme, 1 mM PMSF (pH 8), and subsequent 60 min incubation at 30°C with gentle  
290 shaking. MgCl<sub>2</sub> was added at 10 mM final concentration as soon as the suspension  
291 reached 30°C. Finally, the suspension was centrifuged (11,000 × g, 15 min, 4°C), and the  
292 supernatant containing the periplasmic fraction was collected.

293

294  **$\beta$ -Galactosidase activity assay.** *P. aeruginosa* strains to be assayed were grown  
295 overnight in LB agar plates, then bacterial suspensions were prepared in fresh M63 to  
296  $OD_{600} = 0.5$  with or without oxylipins or OA (0.1 mg/ml). Cultures were incubated at 30°C  
297 for two hours and then 250  $\mu$ l of each culture was mixed with 250  $\mu$ l of Z buffer  
298 [ $Na_2HPO_4 \cdot 7H_2O$  (0.06M),  $NaH_2PO_4 \cdot H_2O$  (0.04M), KCl (0.01M),  $MgSO_4$  (0.001M),  $\beta$ -  
299 mercaptoethanol (0.05M), pH to 7.0], 50  $\mu$ l of 0.1% SDS and 100  $\mu$ l of chloroform and the  
300 mix vortexed for 20 sec. The tubes were incubated at 30°C for 5 min and the reaction  
301 started by adding 100  $\mu$ l of *o*-nitrophenyl- $\beta$ -D-galactoside (ONPG, 4 mg/ml) and briefly  
302 vortex mixing. Reactions were incubated at 30°C for 1 hour and stopped by adding 250  
303  $\mu$ l of 1M  $Na_2CO_3$ . The OD at 420 nm and at 550 nm was measured for each tube. Finally,  
304  $\beta$ -Gal activity was calculated using the equation: Miller Units = 1,000 x [( $OD_{420} - 1.75 \times$   
305  $OD_{550}$ )] / (T x V x  $OD_{600}$ ); where  $OD_{420}$  and  $OD_{550}$  are the final reads from the reaction  
306 mixture,  $OD_{600}$  is the initial cell density of the cultures, T is the time of the reaction in  
307 minutes, and V the volume of culture used in the assay in mL.

308

309 **Thin layer chromatography (TLC):** TLCs were run on 60 Å silica gel plates of 20 X 10  
310 cm and 200  $\mu$ m thickness (Whatman®). The mobile phase solvent was a mix of hexane,  
311 ether and acetic acid (80/20/5). TLC plates were revealed with 10% phosphomolybdic  
312 acid in ethanol. The relative amount of oxylipins were semi-quantitated by densitometry  
313 of TLC spots using ImageJ software.

314

315 **Purification of 7,10-DiHOME oxylipin.** 7,10 Di-HOME was purified as previously  
316 described (6). Briefly, PAO1 was plated in LB agar and incubated overnight at 30°C. The  
317 bacterial biomass was scraped from the plate and used to inoculate 200 ml of M63  
318 complete supplemented with 1% OA. The culture was allowed to produce oxylipins and  
319 then centrifuged at 8000 x g for 15 min to remove bacterial cells. The supernatant was  
320 recovered and acidified (pH=2) with acetic acid glacial. Then a 1 vol/vol organic extraction  
321 with ethyl acetate was carried out and the organic phase was evaporated. The dried  
322 mixture obtained was dissolved in 3 mL of ethyl acetate and used for purification of 7,10-  
323 DiHOME using an Isco Teledyne Combiflash Rf 200 with four channels with 340CF ELSD  
324 (evaporative light scattering detector). Universal RediSep solid sample loading pre-  
325 packed cartridges (5.0 g silica) were used to absorb the crude product and purified on 24  
326 g silica RediSep Rf Gold Silica (20–40 µm spherical silica) columns using an increasing  
327 gradient of ethyl acetate (solvent B) over hexane (solvent A). Fractions collected for each  
328 detected peak were combined and evaporated, then dissolved in ethanol. The purity of  
329 the 7,10-DiHOME was checked by HPLC/MS analysis as previously described (10).

330

331 **Biofilm assay inside *Drosophila* crops.** *P. aeruginosa* colonization of *D. melanogaster*  
332 crop was performed as previously described by Mulcahy *et al* (34). All experiments were  
333 performed with 3-day-old *D. melanogaster* from both sexes of the WT Oregon R (acquired  
334 from Carolina Biologicals Company). *P. aeruginosa* strains constitutively expressing GFP  
335 were cultured on LB agar plates. Bacteria were resuspended in LB to OD600 = 1. Then  
336 100 µl of the suspension was spotted onto a sterile filter (Whatman) that was placed on  
337 the surface of 5 mL of LB agar supplemented with 5% sucrose and 1% oleic acid. Flies

338 were allowed to grow under this condition for 20 hours and then killed. Crops were placed  
339 on a drop of PBS on a microscope slide, sealed with a coverslip and observed using an  
340 EVOS FL Cell Imaging System. Pictures were captured using the same settings for each  
341 picture.

342

343 **Statistical analysis.** Data are representative of three technical replicates and three  
344 biological replicates of each condition. Means plotted and a Student's unpaired *t*-test (two-  
345 tailed) was used to determine differences between means of varying conditions after it  
346 was determined that the variance was similar between groups. All statistical analyses  
347 were performed using GraphPad Prism 8.3.1 software.

348

349 **Data availability.** The authors declare that the data supporting the findings of this study  
350 are available within the article and its supplementary information files, or from the  
351 corresponding author upon request.

352

### 353 **Figure Legends**

354

355 **Figure 1. Screening assay for the search of genes affecting oxylipin production.**

356 **A)** Oxylipins biosynthetic pathway of *P. aeruginosa*. The enzyme 10(S)-dioxygenase  
357 (OdsA) transforms host oleic acid into 10S- Hydroperoxide-octadecenoic acid (10S-  
358 HPOME) by stereospecific oxygenation at position C10 of the oleic acid alky chain.  
359 Subsequently, 10S-HPOME could be isomerized by the enzyme (7S,10S)-  
360 hydroperoxide isomerase to form 7S,10S-DiHOME or be reduced to 10-HOME by an



361 undefined mechanism. **B)** Picture showing the WT phenotype of *P. aeruginosa* vs that of  
362 the  $\Delta$ DS deletion mutant when plated on LB agar + OA (1%). **C)** Representative picture  
363 of a plate section of our transposon screening showing a colony lacking the halo

364

365 **Figure 2. Accumulation of 7,10 DiHOME oxylipin in culture supernatants of PAO1**  
366 **and its isogenic mutant  $\Delta$ xcpQ. A)** The  $\Delta$ xcpQ mutant failed to produce 7,10-DiHOME  
367 in the culture supernatant. The production of 7,10-DiHOME was restored by  $\Delta$ xcpQ when  
368 it was complemented with a wild type xcpQ gene expressed from a plasmid. **B)** Think  
369 layer chromatography (TLC) analysis of oxylipins 10-HOME and 7,10-DiHOME  
370 accumulated in the supernatant of PAO1 and  $\Delta$ xcpQ complemented in trans. **C)** The DS  
371 enzymes accumulate in the periplasm of  $\Delta$ xcpQ. **D)** The  $\Delta$ xcpQ mutant shows a negligible  
372 DS activity in the culture supernatant.

373

374 **Figure 3. Beta-galactosidase activity of P<sub>PA3427</sub>-lacZ fusion in PAO1 and  $\Delta$ xcpQ**  
375 **genetic backgrounds. A)**  $\Delta$ xcpQ mutant showed a negligible PA3727-lacZ expression  
376 in the presence of OA. **B)**  $\Delta$ xcpQ mutant showed the same level of expression as PAO1  
377 when induced with 7,10-DiHOME.

378

379 **Figure 4. Biofilm formation by PAO1 and its isogenic mutant  $\Delta$ xcpQ. A)**  $\Delta$ xcpQ  
380 produces higher amount of biofilm than WT PAO1 when tested in the absence of OA. In  
381 contrast, it produces more biofilm than WT in media supplemented with OA. **B)**  $\Delta$ xcpQ  
382 produced less amount of biofilm in media supplemented with oleic acid. **C)**  
383 Fluorescence microscopy analysis of crops from *Drosophila melanogaster* infected with

384 PAO1 expressing GFP (PAO-GFP) or  $\Delta xcpQ$  expressing GFP ( $\Delta xcpQ$ -GFP). PAO1  
385 formed more biofilm than  $\Delta xcpQ$ . Bars represent 400  $\mu$ m. The size/ resolution for each  
386 panel was adjusted to 2.125 1.587 in/600 dpi from 17.770 13.333 in/72 dpi of the  
387 originals. Pictures are representative of three independent experiments.

388

389 **Figure 5. Proposed model of ODS.** At low cell density the DS operon is weakly  
390 expressed. When the cell density increases and host oleic acid is present, the DS  
391 enzymes start to produce oxylipins. Subsequently the oxylipins enter the cells through  
392 ExFadLO and bind OdsR which in turn induces the DS operon. Induced DS enzymes  
393 cross the inner membrane through the Sec secretory pathway to reach the periplasm.  
394 Then the enzymes cross the outer membrane via Xcp type 2 secretion system (T2SS).  
395 This causes a sudden accumulation of extracellular DS enzymes and oxylipins that  
396 activate the ODS system and induce the effector genes.

397

## 398 REFERENCES

399

- 400 1. Kerr KG, Snelling AM. 2009. *Pseudomonas aeruginosa*: a formidable and ever-present  
401 adversary. *J Hosp Infect* 73:338-44.
- 402 2. Jurado-Martin I, Sainz-Mejias M, McClean S. 2021. *Pseudomonas aeruginosa*: An  
403 Audacious Pathogen with an Adaptable Arsenal of Virulence Factors. *Int J Mol Sci* 22.
- 404 3. Mulcahy LR, Isabella VM, Lewis K. 2014. *Pseudomonas aeruginosa* biofilms in disease.  
405 *Microb Ecol* 68:1-12.

- 406 4. Williams P, Camara M. 2009. Quorum sensing and environmental adaptation in  
407 *Pseudomonas aeruginosa*: a tale of regulatory networks and multifunctional signal  
408 molecules. *Curr Opin Microbiol* 12:182-91.
- 409 5. Martinez E, Cosnahan RK, Wu M, Gadila SK, Quick EB, Mobley JA, Campos-Gomez J.  
410 2019. Oxylipins mediate cell-to-cell communication in *Pseudomonas aeruginosa*. *Commun*  
411 *Biol* 2:66.
- 412 6. Martinez E, Campos-Gomez J. 2016. Oxylipins produced by *Pseudomonas aeruginosa*  
413 promote biofilm formation and virulence. *Nat Commun* 7:13823.
- 414 7. Funk CD. 2001. Prostaglandins and leukotrienes: advances in eicosanoid biology. *Science*  
415 294:1871-5.
- 416 8. Andreou A, Brodhun F, Feussner I. 2009. Biosynthesis of oxylipins in non-mammals. *Prog*  
417 *Lipid Res* 48:148-70.
- 418 9. Hajeyah AA, Griffiths WJ, Wang Y, Finch AJ, O'Donnell VB. 2020. The Biosynthesis of  
419 Enzymatically Oxidized Lipids. *Front Endocrinol (Lausanne)* 11:591819.
- 420 10. Martinez E, Hamberg M, Busquets M, Diaz P, Manresa A, Oliw EH. 2010. Biochemical  
421 characterization of the oxygenation of unsaturated fatty acids by the dioxygenase and  
422 hydroperoxide isomerase of *Pseudomonas aeruginosa* 42A2. *J Biol Chem* 285:9339-45.
- 423 11. Estupinan M, Diaz P, Manresa A. 2014. Unveiling the genes responsible for the unique  
424 *Pseudomonas aeruginosa* oleate-diol synthase activity. *Biochim Biophys Acta* 1842:1360-  
425 71.
- 426 12. Whiteley M, Diggle SP, Greenberg EP. 2017. Progress in and promise of bacterial quorum  
427 sensing research. *Nature* 551:313-320.

- 428 13. Papenfort K, Bassler BL. 2016. Quorum sensing signal-response systems in Gram-negative  
429 bacteria. *Nat Rev Microbiol* 14:576-88.
- 430 14. Pesci EC, Milbank JB, Pearson JP, McKnight S, Kende AS, Greenberg EP, Iglewski BH.  
431 1999. Quinolone signaling in the cell-to-cell communication system of *Pseudomonas*  
432 *aeruginosa*. *Proc Natl Acad Sci U S A* 96:11229-34.
- 433 15. Fuqua WC, Winans SC, Greenberg EP. 1994. Quorum sensing in bacteria: the LuxR-LuxI  
434 family of cell density-responsive transcriptional regulators. *J Bacteriol* 176:269-75.
- 435 16. Schuster M, Sexton DJ, Diggle SP, Greenberg EP. 2013. Acyl-homoserine lactone quorum  
436 sensing: from evolution to application. *Annu Rev Microbiol* 67:43-63.
- 437 17. Martinez E, Estupinan M, Pastor FI, Busquets M, Diaz P, Manresa A. 2013. Functional  
438 characterization of ExFadLO, an outer membrane protein required for exporting  
439 oxygenated long-chain fatty acids in *Pseudomonas aeruginosa*. *Biochimie* 95:290-8.
- 440 18. Nilsson T, Martinez E, Manresa A, Oliw EH. 2010. Liquid chromatography/tandem mass  
441 spectrometric analysis of 7,10-dihydroxyoctadecenoic acid, its isotopomers, and other  
442 7,10-dihydroxy fatty acids formed by *Pseudomonas aeruginosa* 42A2. *Rapid Commun*  
443 *Mass Spectrom* 24:777-83.
- 444 19. Jacobs MA, Alwood A, Thaipisuttikul I, Spencer D, Haugen E, Ernst S, Will O, Kaul R,  
445 Raymond C, Levy R, Chun-Rong L, Guenther D, Bovee D, Olson MV, Manoil C. 2003.  
446 Comprehensive transposon mutant library of *Pseudomonas aeruginosa*. *Proc Natl Acad Sci*  
447 *U S A* 100:14339-44.
- 448 20. Nunn DN, Lory S. 1991. Product of the *Pseudomonas aeruginosa* gene *pilD* is a prepilin  
449 leader peptidase. *Proc Natl Acad Sci U S A* 88:3281-5.

- 450 21. Shen M, Zhang H, Shen W, Zou Z, Lu S, Li G, He X, Agnello M, Shi W, Hu F, Le S. 2018.  
451 *Pseudomonas aeruginosa* MutL promotes large chromosomal deletions through non-  
452 homologous end joining to prevent bacteriophage predation. *Nucleic Acids Res* 46:4505-  
453 4514.
- 454 22. Bitter W, Koster M, Latijnhouwers M, de Cock H, Tommassen J. 1998. Formation of  
455 oligomeric rings by XcpQ and PilQ, which are involved in protein transport across the  
456 outer membrane of *Pseudomonas aeruginosa*. *Mol Microbiol* 27:209-19.
- 457 23. Lindgren V, Wretling B. 1987. Characterization of a *Pseudomonas aeruginosa* transposon  
458 insertion mutant with defective release of exoenzymes. *J Gen Microbiol* 133:675-81.
- 459 24. Suriyanarayanan T, Periasamy S, Lin MH, Ishihama Y, Swarup S. 2016. Flagellin FliC  
460 Phosphorylation Affects Type 2 Protease Secretion and Biofilm Dispersal in *Pseudomonas*  
461 *aeruginosa* PAO1. *PLoS One* 11:e0164155.
- 462 25. Douzi B, Ball G, Cambillau C, Tegoni M, Voulhoux R. 2011. Deciphering the Xcp  
463 *Pseudomonas aeruginosa* type II secretion machinery through multiple interactions with  
464 substrates. *J Biol Chem* 286:40792-801.
- 465 26. Ball G, Durand E, Lazdunski A, Filloux A. 2002. A novel type II secretion system in  
466 *Pseudomonas aeruginosa*. *Mol Microbiol* 43:475-85.
- 467 27. Papanikou E, Karamanou S, Economou A. 2007. Bacterial protein secretion through the  
468 translocase nanomachine. *Nat Rev Microbiol* 5:839-51.
- 469 28. Sargent F. 2007. The twin-arginine transport system: moving folded proteins across  
470 membranes. *Biochem Soc Trans* 35:835-47.
- 471 29. Estupinan M, Alvarez-Garcia D, Barril X, Diaz P, Manresa A. 2015. In Silico/In Vivo  
472 Insights into the Functional and Evolutionary Pathway of *Pseudomonas aeruginosa* Oleate-

- 473 Diol Synthase. Discovery of a New Bacterial Di-Heme Cytochrome C Peroxidase  
474 Subfamily. PLoS One 10:e0131462.
- 475 30. Tsirigotaki A, De Geyter J, Sostaric N, Economou A, Karamanou S. 2017. Protein export  
476 through the bacterial Sec pathway. Nat Rev Microbiol 15:21-36.
- 477 31. Van den Berg B, Clemons WM, Jr., Collinson I, Modis Y, Hartmann E, Harrison SC,  
478 Rapoport TA. 2004. X-ray structure of a protein-conducting channel. Nature 427:36-44.
- 479 32. Wood PM. 1978. Periplasmic location of the terminal reductase in nitrite respiration. FEBS  
480 Lett 92:214-8.
- 481 33. Robles-Price A, Wong TY, Sletta H, Valla S, Schiller NL. 2004. AlgX is a periplasmic  
482 protein required for alginate biosynthesis in *Pseudomonas aeruginosa*. J Bacteriol  
483 186:7369-77.
- 484 34. Mulcahy H, Sibley CD, Surette MG, Lewenza S. 2011. *Drosophila melanogaster* as an  
485 animal model for the study of *Pseudomonas aeruginosa* biofilm infections in vivo. PLoS  
486 Pathog 7:e1002299.
- 487 35. de Lorenzo V, Timmis KN. 1994. Analysis and construction of stable phenotypes in gram-  
488 negative bacteria with Tn5- and Tn10-derived minitransposons. Methods Enzymol  
489 235:386-405.
- 490 36. Kovach ME, Phillips RW, Elzer PH, Roop RM, 2nd, Peterson KM. 1994. pBBR1MCS: a  
491 broad-host-range cloning vector. Biotechniques 16:800-2.
- 492 37. Hmelo LR, Borlee BR, Almlad H, Love ME, Randall TE, Tseng BS, Lin C, Irie Y, Storek  
493 KM, Yang JJ, Siehnel RJ, Howell PL, Singh PK, Tolker-Nielsen T, Parsek MR, Schweizer  
494 HP, Harrison JJ. 2015. Precision-engineering the *Pseudomonas aeruginosa* genome with  
495 two-step allelic exchange. Nat Protoc 10:1820-41.
- 496

497 **Table 1:** Genes identified in the screening, their frequencies and functions.

| <b>Gene</b> | <b>Name</b> | <b>Freq</b> | <b>Annotated function</b>               |
|-------------|-------------|-------------|-----------------------------------------|
| PA1288      | exFaLO      | 2           | Oxylipin transporter                    |
| PA2076      | odsR        | 2           | Transcriptional regulator               |
| PA2077      | odsA        | 1           | Oleate 10S-dioxygenase                  |
| PA2078      | odsB        | 2           | Oleate (7S,10S)-hydroperoxide isomerase |
| PA4946      | mutL        | 1           | DNA mismatch repair protein MutL        |
| PA3101      | xcpT        | 3           | General secretion pathway protein T     |
| PA3104      | xcpP        | 1           | General secretion pathway protein P     |
| PA3105      | xcpQ        | 1           | General secretion pathway protein D     |
| PA3103      | xcpR        | 4           | General secretion pathway protein E     |
| PA3100      | XcpU        | 1           | General secretion pathway protein U     |
| PA3099      | xcpV        | 1           | General secretion pathway protein I     |
| PA3098      | xcpW        | 3           | General secretion pathway protein J     |
| PA3097      | xcpX        | 3           | General secretion pathway protein K     |
| PA3096      | xcpY        | 1           | General secretion pathway protein L     |
| PA4528      | pilD        | 5           | Prepilin peptidase                      |

499 **Table 2:** The list of strains, plasmids and oligonucleotides used in this study.

| Strains                        | Description                                                                                          | Source     |
|--------------------------------|------------------------------------------------------------------------------------------------------|------------|
| PAO1                           | <i>P. aeruginosa</i> wild type model strain                                                          | WT*        |
| $\Delta$ DS                    | PAO1 containing an in-frame deletion of DS operon.                                                   | (6)        |
| $\Delta$ xcpQ                  | PAO1 containing an in-frame deletion of xcpQ gene.                                                   | This study |
| $\Delta$ xcpQ (pBB-xcpQ)       | $\Delta$ xcpQ containing plasmid pBB-xcpQ                                                            | This study |
| PAO1 (pBB-PA3727-lacZ)         | PAO1 containing plasmid pBB-PA3727-lacZ                                                              | (5)        |
| $\Delta$ xcpQ (pBB-P3727-lacZ) | $\Delta$ xcpQ containing plasmid pBB-PA3727-lacZ                                                     | This study |
| PAO1-GFP                       | PAO1 expressing GFP                                                                                  | (6)        |
| $\Delta$ xcpQ-GFP              | $\Delta$ xcpQ expressing GFP                                                                         | This study |
| One Shot® TOP10                | <i>E. coli</i> used for plasmid propagation                                                          | Invitrogen |
| S17-1 $\lambda$ pir            | <i>E. coli</i> used as donor strain for introduction of suicide plasmids into <i>P. aeruginosa</i> . | (35)       |
| <b>Plasmids</b>                |                                                                                                      |            |
| pBBR1MCS                       | Conjugative multipurpose cloning vector able to replicate in <i>P. aeruginosa</i> .                  | (36)       |
| pEX100Tlink                    | Suicide vector used for allelic replacement in <i>P. aeruginosa</i> .                                | (37)       |
| pEX-xcpQ                       | pEX100Tlink containing xcpQ gene of PAO1.                                                            | This study |
| pEX- $\Delta$ xcpQ             | pEX-PA2076 containing an in-frame deletion in xcpQ                                                   | This study |
| pBB-xcpQ                       | pBBR1MCS expressing xcpQ                                                                             | This study |
| pBB-PA3727-lacZ                | pBBR1MCS expressing lacZ under xcpQ promotor                                                         | (5)        |
| <b>Oligonucleotides</b>        |                                                                                                      |            |
| xcpQ-BamHI-FW                  | For internal deletion of xcpQ/<br>gatcggatcccgaacgactggaaggggc                                       | This study |
| xcpQ-BamHI-RV                  | For internal deletion of xcpQ/<br>gtcattataaaacgccaaccagttgttcgat                                    | This study |
| xcpQ-HindIII-RV                | For cloning xcpQ in pEX100Tlink and pBBR1MCS/<br>gtcaaagctaccggtccgatgctgctgg                        | This study |
| xcpQ-SacI-FW                   | For cloning xcpQ in pEX100Tlink and pBBR1MCS/<br>tcaggagctcccacgagtcgatccgcag                        | This study |

500 \* WT (Washington university, Manoil lab)



Figure 1

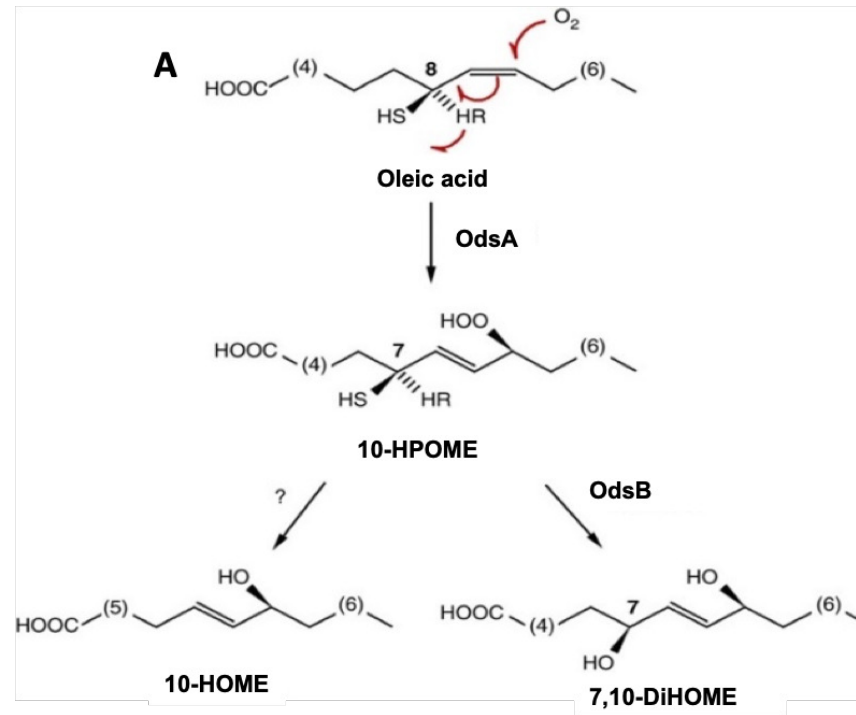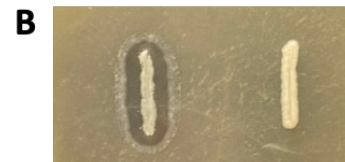

PAO1  $\Delta ds$

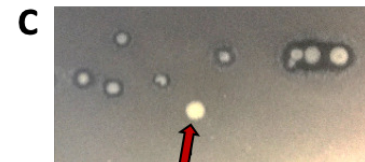

Screening of PA transposon library

Figure 2

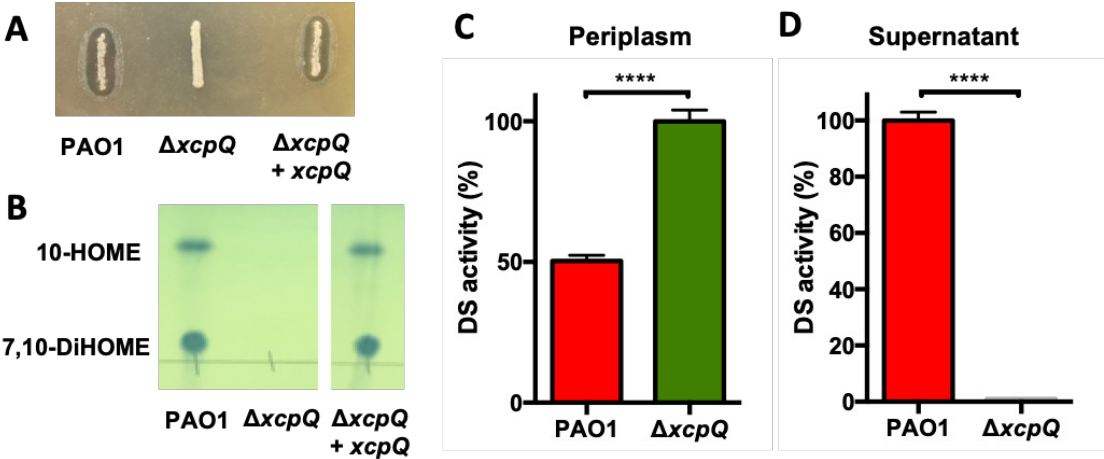

Figure 3

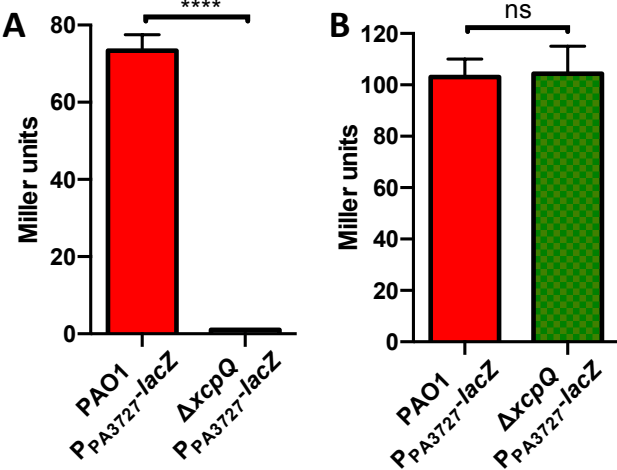

Figure 4

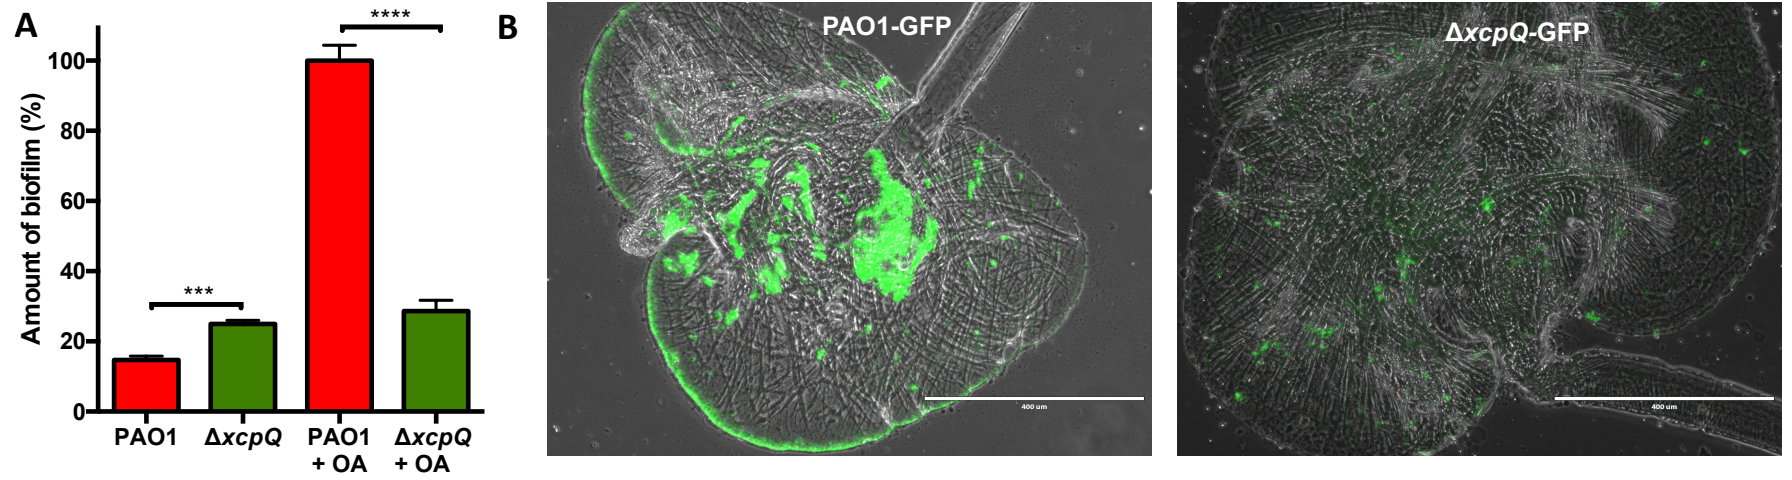

Figure 5

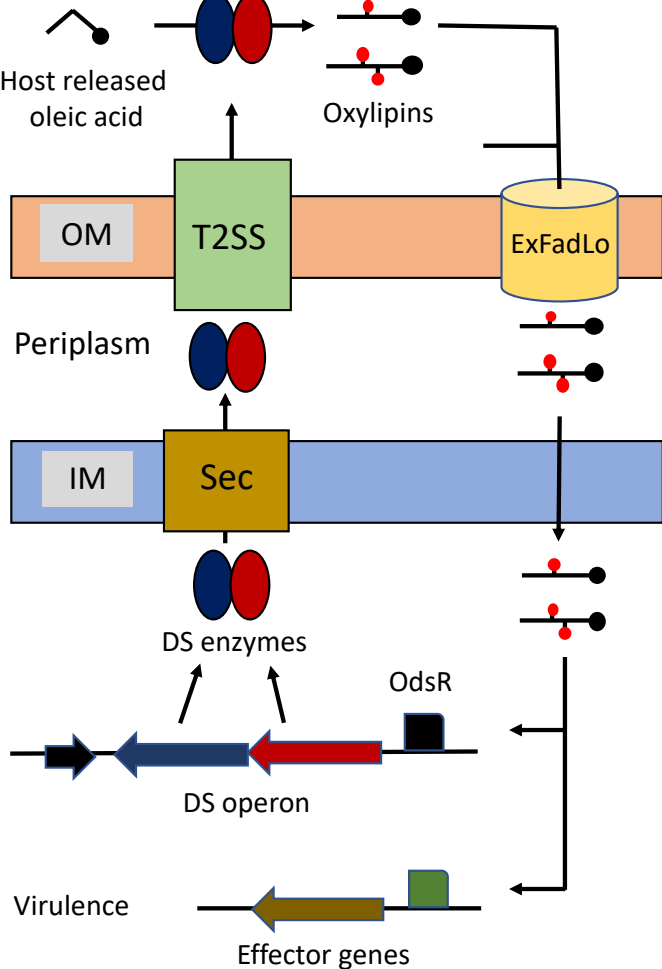

Source: https://www.biorxiv.org/content/10.1101/2021.09.08.459554v1.full.pdf
